# Supplementary material for: Atmospheric histories, growth rates and solubilities in seawater and other natural waters of the potential transient tracers HCFC-22, HCFC-141b, HCFC-142b, HFC-134a, HFC-125, HFC-23, PFC-14 and PFC-116
Source: Copernicus journal article supplement (doi:10.5194/os-15-33-2019), 2019-01-11
Supplement: Supplementary file 1 [file os-15-33-2019-supplement.zip]

Archive with 4 entries (3 files):
- Supplement/
- Supplement/Supplement.pdf
- Supplement/TableS2.xlsx
- os-15-33-2019-supplement-title-page.pdf
