# Supplementary material for: Atmospheric histories, growth rates and solubilities in seawater and other natural waters of the potential transient tracers HCFC-22, HCFC-141b, HCFC-142b, HFC-134a, HFC-125, HFC-23, PFC-14 and PFC-116
Source: Copernicus journal article supplement (doi:10.5194/os-15-33-2019), 2019-01-11
Supplement: Supplementary file 1 [file os-15-33-2019-supplement.zip › os-15-33-2019-supplement-title-page.pdf]

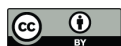

## *Supplement of*

# **Atmospheric histories, growth rates and solubilities in seawater and other natural waters of the potential transient tracers HCFC-22, HCFC-141b, HCFC-142b, HFC-134a, HFC-125, HFC-23, PFC-14 and PFC-116**

**Pingyang Li et al.**

*Correspondence to:* Toste Tanhua (ttanhua@geomar.de)

- os-15-33-2019-supplement-title-page.pdf
- Supplement
  - Supplement.pdf
  - TableS2.xlsx

The copyright of individual parts of the supplement might differ from the CC BY 4.0 License.
