# Supplementary material for: Atmospheric histories, growth rates and solubilities in seawater and other natural waters of the potential transient tracers HCFC-22, HCFC-141b, HCFC-142b, HFC-134a, HFC-125, HFC-23, PFC-14 and PFC-116
Source: Copernicus journal article supplement (doi:10.5194/os-15-33-2019), 2019-01-11
Supplement: Supplementary file 1 [file os-15-33-2019-supplement.zip › Supplement/TableS2.xlsx]

## Sheet: Title page
Atmospheric histories, growth rates and solubilities in seawater and other natural waters of the potential transient tracers HCFC-22, HCFC-141b, HCFC-142b, HFC-134a, HFC-125, HFC-23, PFC-14 and PFC-116
Pingyang Li 1, Jens Mühle 2, Stephen A. Montzka 3, David E. Oram 4, Benjamin R. Miller 3, Ray F. Weiss 2 , Paul J. Fraser 5 and Toste Tanhua 1
1GEOMAR Helmholtz Centre for Ocean Research Kiel, Marine Biogeochemistry, 24105 Kiel, Germany
2Scripps Institution of Oceanography, University of California, San Diego, La Jolla, California, 92093, USA
3Earth System Research Laboratory, National Oceanic and Atmospheric Administration, Boulder, Colorado, 80305, USA
4National Centre for Atmospheric Science, Centre for Ocean and Atmospheric Sciences, School of Environmental Sciences, University of East Anglia, Norwich, NR4 7TJ, UK
5Climate Science Centre, Commonwealth Scientific and Industrial Research Organization Oceans and Atmosphere, Aspendale, Victoria, 3195, Australia
Table S2. Atmospheric mole fractions for HCFC-22, HCFC-141b, HCFC-142b, HFC-134a, HFC-125, HFC-23, PFC-14 and PFC-116

## Sheet: HCFC-22
HCFC-22
scale: SIO-05
annual means						JFM means				JAS means
Year	NH (ppt)	NH error (ppt)	SH (ppt)	SH error (ppt)		Year	NH (ppt)	NH error (ppt)		Year	SH (ppt)	SH error (ppt)
1943.5	0	1.68339	0	1.6746		1943.13	0	1.90348		1943.62	0	1.65712
1944.5	0	1.19285	0	1.31351		1944.13	0	1.31138		1944.62	0	1.25097
1945.5	0	1.11229	0	0.941759		1945.13	0	1.10205		1945.62	0	0.897699
1946.5	0	1.113	0	0.833408		1946.13	0	1.11841		1946.62	0	0.830134
1947.5	0.000263727	1.10157	0	0.826969		1947.13	0	1.10502		1947.62	0	0.826841
1948.5	0.00744297	1.09428	0	0.824384		1948.13	0.00281104	1.09631		1948.62	0	0.823964
1949.5	0.0291863	1.09186	0.000243833	0.818148		1949.13	0.0186094	1.09217		1949.62	0.000260763	0.817237
1950.5	0.0639168	1.09153	0.00739749	0.812937		1950.13	0.049503	1.09156		1950.62	0.00859198	0.812379
1951.5	0.106398	1.09152	0.0299995	0.810453		1951.13	0.0892271	1.09152		1951.62	0.0333749	0.810229
1952.5	0.15907	1.0915	0.0673158	0.809685		1952.13	0.137327	1.09151		1952.62	0.072395	0.809633
1953.5	0.230067	1.09148	0.119122	0.809554		1953.13	0.199138	1.09149		1953.62	0.126053	0.809549
1954.5	0.336497	1.09148	0.187739	0.809548		1954.13	0.289778	1.09148		1954.62	0.19685	0.809548
1955.5	0.488235	1.09148	0.275069	0.809541		1955.13	0.424291	1.09148		1955.62	0.286556	0.80954
1956.5	0.684305	1.09148	0.384896	0.809529		1956.13	0.603982	1.09148		1956.62	0.399328	0.809527
1957.5	0.926659	1.09148	0.525071	0.80952		1957.13	0.827961	1.09148		1957.62	0.543586	0.80952
1958.5	1.22219	1.09148	0.70557	0.809517		1958.13	1.10279	1.09148		1958.62	0.729445	0.809516
1959.5	1.57186	1.09148	0.93452	0.809516		1959.13	1.43276	1.09148		1959.62	0.964689	0.809516
1960.5	1.97324	1.09148	1.21799	0.809516		1960.13	1.81443	1.09148		1960.62	1.25516	0.809515
1961.5	2.43562	1.09148	1.5583	0.809515		1961.13	2.25107	1.09148		1961.62	1.60257	0.809515
1962.5	2.97931	1.09148	1.95712	0.809515		1962.13	2.76126	1.09148		1962.62	2.00873	0.809515
1963.5	3.62392	1.09148	2.42294	0.809515		1963.13	3.36446	1.09148		1963.62	2.48327	0.809515
1964.5	4.39557	1.09148	2.9713	0.809515		1964.13	4.08414	1.09148		1964.62	3.04246	0.809515
1965.5	5.32344	1.09148	3.61977	0.809515		1965.13	4.9484	1.09148		1965.62	3.70399	0.809515
1966.5	6.44276	1.09148	4.38992	0.809515		1966.13	5.99015	1.09148		1966.62	4.49005	0.809515
1967.5	7.78946	1.09148	5.30545	0.809512		1967.13	7.24645	1.09148		1967.62	5.42448	0.809512
1968.5	9.38987	1.09148	6.3937	0.809494		1968.13	8.74944	1.09148		1968.62	6.53522	0.809491
1969.5	11.2478	1.09148	7.68249	0.809435		1969.13	10.5124	1.09148		1969.62	7.84994	0.809426
1970.5	13.3556	1.09148	9.19097	0.809313		1970.13	12.5261	1.09148		1970.62	9.38636	0.809295
1971.5	15.718	1.09148	10.9319	0.809177		1971.13	14.7938	1.09148		1971.62	11.1566	0.80916
1972.5	18.3215	1.09148	12.9214	0.809178		1972.13	17.3096	1.09148		1972.62	13.1778	0.809188
1973.5	21.1478	1.09148	15.1795	0.809132		1973.13	20.0564	1.09148		1973.62	15.4701	0.80914
1974.5	24.1673	1.09148	17.7286	0.806638		1974.13	23.0082	1.09148		1974.62	18.0563	0.806263
1975.5	27.3709	1.09148	20.5872	0.793365		1975.13	26.1383	1.09148		1975.62	20.9541	0.791313
1976.5	30.8041	1.09148	23.7613	0.752656		1976.13	29.4776	1.09148		1976.62	24.1679	0.746279
1977.5	34.4988	1.09148	27.2236	0.671341		1977.13	33.0733	1.09148		1977.62	27.6655	0.658843
1978.5	38.441	1.09148	30.8533	0.587887		1978.13	36.9289	1.09148		1978.62	31.3103	0.577795
1979.5	42.5793	1.09148	34.4827	0.58495		1979.13	41.0036	1.09148		1979.62	34.9337	0.588537
1980.5	46.8523	1.09148	38.1537	0.601962		1980.13	45.2346	1.09148		1980.62	38.6153	0.603129
1981.5	51.2195	1.09148	41.8918	0.604972		1981.13	49.5696	1.09148		1981.62	42.3604	0.605311
1982.5	55.6921	1.09148	45.6607	0.606584		1982.13	53.9936	1.09148		1982.62	46.1313	0.606672
1983.5	60.3358	1.09148	49.5331	0.564433		1983.13	58.5656	1.09148		1983.62	50.0212	0.556376
1984.5	65.1691	1.09148	53.5801	0.524367		1984.13	63.3294	1.09148		1984.62	54.0917	0.521462
1985.5	70.1864	1.09148	57.849	0.523467		1985.13	68.276	1.09148		1985.62	58.3894	0.52383
1986.5	75.4161	1.09148	62.3418	0.512089		1986.13	73.4192	1.09148		1986.62	62.9108	0.509804
1987.5	80.9069	1.09147	67.0809	0.512289		1987.13	78.8041	1.09147		1987.62	67.6794	0.513548
1988.5	86.6699	1.09147	72.0645	0.52186		1988.13	84.4755	1.09147		1988.62	72.6954	0.522785
1989.5	92.5838	1.09147	77.3718	0.500607		1989.13	90.3588	1.09147		1989.62	78.0448	0.496495
1990.5	98.488	1.09146	82.905	0.461075		1990.13	96.2897	1.09147		1990.62	83.6046	0.455907
1991.5	104.254	1.09138	88.4578	0.393318		1991.13	102.123	1.09143		1991.62	89.1469	0.382104
1992.5	109.867	1.09113	93.882	0.329208		1992.13	107.773	1.09126		1992.62	94.5562	0.322392
1993.5	115.444	1.09077	99.1827	0.296448		1993.13	113.366	1.09089		1993.62	99.5281	0.771098
1994.5	120.88	1.09062	104.484	0.287957		1994.13	118.873	1.09063		1994.62	105.525	1.13112
1995.5	126.133	1.08777	109.644	0.284282		1995.13	124.189	1.09016		1995.62	110.968	0.910322
1996.5	131.202	1.06218	114.573	0.292556		1996.13	129.342	1.07893		1996.62	114.363	1.48843
1997.5	136.007	0.95543	119.314	0.300731		1997.13	134.24	1.01575		1997.62	120.176	1.06586
1998.5	140.682	0.706584	124.177	0.307943		1998.13	138.936	0.815979		1998.62	124.896	0.481345
1999.5	145.535	0.463865	129.389	0.309367		1999.12	142.837	1.05784		1999.62	131.385	0.525791
2000.5	151.503	0.418964	134.608	0.309418		2000.12	147.282	1.20933		2000.62	135.746	0.536214
2001.5	158.086	0.417908	139.676	0.309433		2001.12	155.709	1.04075		2001.62	141.065	0.936842
2002.5	164.037	0.417415	144.608	0.309441		2002.12	160.534	1.0181		2002.62	145.844	0.609936
2003.5	169.32	0.417366	149.479	0.309442		2003.12	166.66	1.47298		2003.62	150.515	0.653161
2004.5	174.453	0.417365	154.55	0.309442		2004.12	172.353	0.986545		2004.62	156.454	0.560031
2005.5	180.447	0.417366	159.962	0.309444		2005.12	177.264	1.16267		2005.62	161.29	0.713591
2006.5	187.735	0.417381	166.061	0.309451		2006.12	184.626	1.11797		2006.62	167.155	0.756089
2007.5	195.973	0.417423	173.058	0.309456		2007.12	191.985	0.873592		2007.62	174.291	0.741843
2008.5	204.373	0.41965	180.595	0.309617		2008.12	201.385	0.905873		2008.62	182.276	0.675668
2009.5	212.217	0.427681	188.237	0.31163		2009.12	208.036	1.34944		2009.62	189.561	0.665199
2010.5	219.552	0.430002	195.807	0.316579		2010.12	216.657	0.926185		2010.62	197.204	0.683373
2011.5	225.762	0.430054	203.039	0.318669		2011.12	223.822	1.15313		2011.62	205.171	1.05493
2012.5	231.201	0.430069	209.371	0.318863		2012.12	228.196	1.09061		2012.62	210.933	0.738942
2013.5	236.568	0.43008	214.679	0.318876		2013.12	235.377	0.993521		2013.62	215.572	0.686887
2014.5	241.638	0.430094	219.271	0.319158		2014.12	238.801	0.810293		2014.62	220.781	0.670268
2015.5	245.922	0.430727	223.356	0.321311		2015.12	244.357	1.01602		2015.62	224.756	0.636148
2016.5	249.636	0.435687	227.23	0.325083		2016.12	247.862	0.876464		2016.62	228.039	0.696714
2017.5	253.165	0.446247	231.212	0.340757		2017.12	251.615	0.837719		2017.62	232.77	0.685405
						2018.12	254.967	0.560683

## Sheet: HCFC-141b
HCFC-141b
scale: SIO-05
annual means						JFM means				JAS means
Year	NH (ppt)	NH error (ppt)	SH (ppt)	SH error (ppt)		Year	NH (ppt)	NH error (ppt)		Year	SH (ppt)	SH error (ppt)
1976.5	0	0	0	0		1976.13	0	0		1976.62	0	0
1977.5	0.00516162	0.0999114	0.0159782	0.301063		1977.13	-0.000189593	0.0999085		1977.62	0.0216531	0.312228
1978.5	0.0208481	0.0999195	0.0469941	0.2615		1978.13	0.0146502	0.0999164		1978.62	0.050023	0.238181
1979.5	0.0379463	0.0999273	0.0525435	0.241005		1979.13	0.0314464	0.0999246		1979.62	0.0529642	0.257874
1980.5	0.0550029	0.0999331	0.0589989	0.27376		1980.13	0.0487456	0.0999314		1980.62	0.0599592	0.272831
1981.5	0.0705644	0.0999354	0.0603179	0.267897		1981.13	0.0650942	0.0999353		1981.62	0.0601271	0.267444
1982.5	0.0831771	0.0999326	0.0627901	0.276895		1982.13	0.0790389	0.0999346		1982.62	0.0634527	0.279336
1983.5	0.0913878	0.099923	0.0688954	0.255105		1983.13	0.0891262	0.0999278		1983.62	0.0695762	0.250382
1984.5	0.0937761	0.0999052	0.0726472	0.178348		1984.13	0.0939024	0.0999132		1984.62	0.0737981	0.176922
1985.5	0.0902658	0.0998854	0.0665839	0.235129		1985.13	0.092292	0.0998914		1985.62	0.0650734	0.236984
1986.5	0.0838178	0.0998866	0.092707	0.227887		1986.13	0.0863682	0.0998805		1986.62	0.099714	0.233567
1987.5	0.079427	0.0999033	0.0774433	0.178024		1987.13	0.0798344	0.0999071		1987.62	0.0658424	0.180397
1988.5	0.0880125	0.0997597	0.060459	0.253902		1988.13	0.0836062	0.0998164		1988.62	0.0617554	0.251274
1989.5	0.081039	0.0998183	0.0699358	0.250687		1989.13	0.0868511	0.0997861		1989.62	0.0706096	0.250797
1990.5	0.0776325	0.0998894	0.0747403	0.254479		1990.13	0.0854021	0.0998423		1990.62	0.0754993	0.257112
1991.5	0.0865886	0.0999501	0.0890471	0.189324		1991.13	0.0417787	0.100013		1991.62	0.0921801	0.179591
1992.5	0.444221	0.10004	0.136797	0.191735		1992.13	0.296951	0.0996725		1992.62	0.14392	0.18347
1993.5	0.988904	0.0949268	0.387159	0.110528		1993.13	0.63803	0.098492		1993.62	0.429199	0.0472302
1994.5	3.47264	0.102338	1.1229	0.102499		1994.13	2.22089	0.0964982		1994.62	1.3294	0.0808458
1995.5	5.15252	0.0854768	2.41293	0.106251		1995.13	4.28296	0.0854834		1995.62	2.51037	0.0480028
1996.5	7.28408	0.086637	4.03602	0.104789		1996.13	6.44271	0.0854745		1996.62	4.26852	0.115668
1997.5	9.0641	0.111585	5.84624	0.109455		1997.13	8.73417	0.112155		1997.62	6.06746	0.0590932
1998.5	11.1664	0.0971107	7.6336	0.10024		1998.13	10.115	0.100369		1998.62	7.84855	0.0807858
1999.5	13.231	0.0854745	9.55657	0.0980014		1999.12	12.6427	0.218033		1999.62	9.67918	0.0883938
2000.5	15.0932	0.0854745	11.139	0.108379		2000.12	14.225	0.268511		2000.62	11.3868	0.0712376
2001.5	16.2937	0.0854745	12.6363	0.100033		2001.12	16.0923	0.224537		2001.62	12.8301	0.130831
2002.5	17.6182	0.0854745	13.997	0.114143		2002.12	17.0369	0.248052		2002.62	14.1799	0.0816072
2003.5	18.6175	0.0854745	15.26	0.102456		2003.12	18.2986	0.297481		2003.62	15.3676	0.0835599
2004.5	19.1738	0.0854745	16.278	0.106746		2004.12	19.2081	0.163689		2004.62	16.4482	0.0839457
2005.5	19.163	0.0854745	16.7372	0.120112		2005.12	19.0582	0.146452		2005.62	16.8781	0.10583
2006.5	19.5852	0.0854745	17.0445	0.116975		2006.12	19.3011	0.134545		2006.62	17.2117	0.102546
2007.5	20.2603	0.0854745	17.6334	0.120135		2007.12	20.0013	0.106038		2007.62	17.7741	0.0924612
2008.5	20.9145	0.0854745	18.3114	0.116648		2008.12	20.6897	0.129516		2008.62	18.4733	0.0701258
2009.5	21.2679	0.0854745	18.7748	0.11403		2009.12	21.0384	0.145253		2009.62	18.9037	0.0990856
2010.5	22.0331	0.0854745	19.2542	0.117526		2010.12	21.6899	0.125466		2010.62	19.426	0.109858
2011.5	23.0712	0.0854745	20.1059	0.109248		2011.12	22.4751	0.145444		2011.62	20.2551	0.130739
2012.5	24.2659	0.0854745	20.9962	0.120147		2012.12	23.8073	0.162963		2012.62	21.2434	0.106843
2013.5	25.0403	0.0854745	21.8749	0.120157		2013.12	24.9165	0.138198		2013.62	22.0526	0.0881779
2014.5	25.491	0.0854745	22.5206	0.120157		2014.12	25.1499	0.0982301		2014.62	22.7209	0.0784513
2015.5	25.7962	0.0854745	22.9247	0.120157		2015.12	25.7849	0.131406		2015.62	23.1037	0.0821384
2016.5	26.0303	0.0854745	23.2247	0.120616		2016.12	25.9945	0.11434		2016.62	23.3384	0.0914012
2017.5	25.9595	0.0854745	23.587	0.130338		2017.12	26.0369	0.117042		2017.62	23.6691	0.129415
						2018.12	25.8224	0.121803

## Sheet: HCFC-142b
HCFC-142b
scale: SIO-05
annual means						JFM means				JAS means
Year	NH (ppt)	NH error (ppt)	SH (ppt)	SH error (ppt)		Year	NH (ppt)	NH error (ppt)		Year	SH (ppt)	SH error (ppt)
1935.5	0	0.139209	0	0.269421		1935.13	0	0.139198		1935.62	0	0.270154
1936.5	0	0.139239	0	0.27544		1936.13	0	0.139228		1936.62	0.000234925	0.276192
1937.5	0.0030358	0.13927	0.00502275	0.281474		1937.13	0.00179326	0.139258		1937.62	0.00570615	0.282223
1938.5	0.00638535	0.139299	0.0104763	0.287337		1938.13	0.00511932	0.139288		1938.62	0.0111568	0.288059
1939.5	0.00982497	0.139327	0.015892	0.292844		1939.13	0.00851786	0.139317		1939.62	0.0165672	0.293516
1940.5	0.0134016	0.139352	0.0212503	0.297808		1940.13	0.0120358	0.139343		1940.62	0.0219176	0.298407
1941.5	0.0171623	0.139373	0.0265313	0.302044		1941.13	0.0157202	0.139366		1941.62	0.0271884	0.302547
1942.5	0.0211539	0.13939	0.0317153	0.305366		1942.13	0.0196179	0.139385		1942.62	0.0323597	0.30575
1943.5	0.0254234	0.139402	0.0367827	0.307588		1943.13	0.023776	0.139398		1943.62	0.0374119	0.30783
1944.5	0.0300178	0.139406	0.0417138	0.308525		1944.13	0.0282413	0.139406		1944.62	0.0423254	0.308601
1945.5	0.0349841	0.139404	0.0464888	0.307992		1945.13	0.0330609	0.139406		1945.62	0.0470802	0.307878
1946.5	0.0403691	0.139393	0.051088	0.305802		1946.13	0.0382817	0.139398		1946.62	0.0516569	0.305474
1947.5	0.04622	0.139373	0.0554917	0.301769		1947.13	0.0439507	0.139382		1947.62	0.0560356	0.301204
1948.5	0.0525835	0.139342	0.0596803	0.29571		1948.13	0.0501147	0.139355		1948.62	0.0601966	0.294881
1949.5	0.0595068	0.1393	0.0636339	0.287438		1949.13	0.0568209	0.139318		1949.62	0.0641203	0.286321
1950.5	0.0670364	0.139247	0.0673331	0.276769		1950.13	0.0641162	0.139269		1950.62	0.0677869	0.275338
1951.5	0.0751781	0.139181	0.0707812	0.263695		1951.13	0.0720406	0.139207		1951.62	0.0712037	0.261954
1952.5	0.083783	0.139106	0.0740678	0.248877		1952.13	0.0805047	0.139135		1952.62	0.074474	0.246939
1953.5	0.0926397	0.139028	0.0773178	0.233249		1953.13	0.0893003	0.139057		1953.62	0.0777233	0.231236
1954.5	0.101535	0.13895	0.0806565	0.217752		1954.13	0.0982145	0.138979		1954.62	0.0810771	0.215785
1955.5	0.110257	0.138877	0.0842096	0.203326		1955.13	0.107035	0.138903		1955.62	0.0846608	0.201528
1956.5	0.118592	0.138815	0.0881024	0.190914		1956.13	0.115547	0.138836		1956.62	0.0886	0.189408
1957.5	0.126326	0.138768	0.0924606	0.181461		1957.13	0.12354	0.138783		1957.62	0.0930202	0.180367
1958.5	0.133249	0.13874	0.0974095	0.175912		1958.13	0.1308	0.138747		1958.62	0.0980468	0.175345
1959.5	0.139145	0.138736	0.103075	0.175218		1959.13	0.137114	0.138733		1959.62	0.103805	0.175287
1960.5	0.143803	0.138762	0.109582	0.180326		1960.13	0.14227	0.138747		1960.62	0.110422	0.181133
1961.5	0.14701	0.138822	0.117056	0.192183		1961.13	0.146054	0.138794		1961.62	0.118021	0.193827
1962.5	0.148553	0.13892	0.125623	0.211731		1962.13	0.148253	0.138876		1962.62	0.126728	0.214309
1963.5	0.148218	0.139061	0.135408	0.23991		1963.13	0.148655	0.139001		1963.62	0.136669	0.243521
1964.5	0.145797	0.139251	0.146537	0.277638		1964.13	0.147047	0.139172		1964.62	0.14797	0.282401
1965.5	0.141282	0.13949	0.159085	0.324792		1965.13	0.143263	0.139393		1965.62	0.160697	0.330662
1966.5	0.13524	0.139772	0.172995	0.378414		1966.13	0.137678	0.13966		1966.62	0.174774	0.384972
1967.5	0.128412	0.140087	0.188167	0.434708		1967.13	0.131028	0.139965		1967.62	0.190101	0.44152
1968.5	0.12154	0.140426	0.204502	0.489879		1968.13	0.124057	0.140296		1968.62	0.206578	0.496493
1969.5	0.115369	0.140779	0.221899	0.540124		1969.13	0.117507	0.140645		1969.62	0.224105	0.546076
1970.5	0.11064	0.141136	0.240259	0.581645		1970.13	0.112121	0.141002		1970.62	0.242582	0.586458
1971.5	0.108097	0.141488	0.259482	0.610641		1971.13	0.108643	0.141358		1971.62	0.26191	0.613826
1972.5	0.108483	0.141826	0.279468	0.623313		1972.13	0.107816	0.141702		1972.62	0.281988	0.624365
1973.5	0.112541	0.142139	0.300117	0.615873		1973.13	0.110382	0.142026		1973.62	0.302716	0.614266
1974.5	0.121014	0.142418	0.321329	0.584547		1974.13	0.117085	0.14232		1974.62	0.323996	0.579715
1975.5	0.134646	0.142654	0.343005	0.525603		1975.13	0.128667	0.142573		1975.62	0.345726	0.516904
1976.5	0.154178	0.142837	0.365044	0.435429		1976.13	0.145872	0.142777		1976.62	0.367808	0.422033
1977.5	0.180355	0.142957	0.387347	0.310872		1977.13	0.169443	0.142923		1977.62	0.39014	0.291332
1978.5	0.213918	0.143005	0.409286	0.163252		1978.13	0.200122	0.142999		1978.62	0.412295	0.134305
1979.5	0.255612	0.142971	0.421483	0.154799		1979.13	0.238653	0.142997		1979.62	0.422065	0.161673
1980.5	0.306179	0.142846	0.439398	0.178546		1980.13	0.28578	0.142908		1980.62	0.442145	0.180036
1981.5	0.366363	0.14262	0.495959	0.160088		1981.13	0.342244	0.142721		1981.62	0.504547	0.156216
1982.5	0.436906	0.142283	0.567063	0.155501		1982.13	0.408788	0.142427		1982.62	0.575503	0.157045
1983.5	0.518551	0.141826	0.665383	0.146192		1983.13	0.486157	0.142017		1983.62	0.679072	0.143297
1984.5	0.612042	0.14124	0.773228	0.119477		1984.13	0.575093	0.141481		1984.62	0.787428	0.117719
1985.5	0.718121	0.140514	0.83567	0.133765		1985.13	0.676339	0.140809		1985.62	0.840329	0.136039
1986.5	0.837531	0.13964	0.851775	0.118503		1986.13	0.790638	0.139991		1986.62	0.853226	0.114693
1987.5	0.908663	0.138935	0.851396	0.102542		1987.13	0.91752	0.139026		1987.62	0.85041	0.101606
1988.5	0.924559	0.138734	0.897752	0.144477		1988.13	0.871022	0.138872		1988.62	0.905687	0.150692
1989.5	1.01119	0.138963	1.05093	0.151941		1989.13	0.974937	0.138865		1989.62	1.07456	0.150613
1990.5	2.03483	0.139149	1.30421	0.13946		1990.13	1.5	0.139038		1990.62	1.33636	0.13811
1991.5	2.70097	0.139299	1.76297	0.100186		1991.13	2.54542	0.13943		1991.62	1.83006	0.0921599
1992.5	3.82573	0.139458	2.5879	0.0764843		1992.13	3.20324	0.138697		1992.62	2.70075	0.0748273
1993.5	5.20551	0.12894	3.67773	0.0681066		1993.13	4.81194	0.136284		1993.62	3.81891	0.0664639
1994.5	6.96408	0.139187	4.78956	0.0624813		1994.13	6.15027	0.132141		1994.29	5.06489	0.161816
1995.5	7.76852	0.10975	5.8563	0.0619535		1995.12	7.457	0.261659		1995.62	5.96097	0.145594
1996.5	9.13121	0.109749	6.96564	0.0625706		1996.12	8.63967	0.265222		1996.62	7.08543	0.142803
1997.5	10.5969	0.10986	7.98676	0.0640825		1997.12	9.99233	0.205764		1997.62	8.11323	0.109211
1998.5	11.4528	0.133542	9.02992	0.060213		1998.12	11.3325	0.23095		1998.62	9.12707	0.0637516
1999.5	12.4334	0.109749	10.1214	0.0584882		1999.12	11.8883	0.203612		1999.62	10.1909	0.0661702
2000.5	13.6402	0.109749	11.073	0.0632281		2000.12	13.0537	0.220756		2000.62	11.2613	0.0749588
2001.5	14.6182	0.109749	12.0963	0.0606744		2001.12	14.4807	0.205904		2001.62	12.2373	0.0971297
2002.5	15.0443	0.109749	12.9348	0.0653685		2002.12	14.9145	0.176019		2002.62	13.0358	0.0665375
2003.5	15.5926	0.109749	13.6564	0.0621018		2003.12	15.2795	0.186561		2003.62	13.7168	0.0544883
2004.5	16.3019	0.109749	14.2821	0.0642306		2004.12	16.0373	0.137189		2004.62	14.3985	0.0509651
2005.5	16.919	0.109749	14.8448	0.0693581		2005.12	16.4639	0.148839		2005.62	14.9372	0.0635887
2006.5	18.0344	0.109749	15.5674	0.0697988		2006.12	17.4973	0.135738		2006.62	15.6792	0.0817795
2007.5	19.2678	0.109749	16.5659	0.0693897		2007.12	18.7287	0.115437		2007.62	16.72	0.0753392
2008.5	20.4822	0.109749	17.7177	0.069037		2008.12	19.8532	0.125259		2008.62	17.8929	0.0673972
2009.5	21.3762	0.109749	18.8178	0.0685242		2009.12	20.9636	0.169423		2009.62	19.0057	0.067111
2010.5	22.0025	0.109749	19.7195	0.0688536		2010.12	21.6115	0.109299		2010.62	19.7953	0.0867336
2011.5	22.6779	0.109749	20.5264	0.0655397		2011.12	22.3078	0.120428		2011.62	20.7114	0.104409
2012.5	22.9837	0.109749	21.0916	0.0713545		2012.12	22.7596	0.129108		2012.62	21.189	0.0565687
2013.5	23.2204	0.109749	21.426	0.0716946		2013.12	23.1097	0.100555		2013.62	21.4994	0.0546058
2014.5	23.3171	0.109749	21.6442	0.0717044		2014.12	23.1522	0.0953595		2014.62	21.7284	0.055927
2015.5	23.3679	0.109749	21.8017	0.071707		2015.12	23.2412	0.0969823		2015.62	21.9109	0.0514742
2016.5	23.3838	0.109749	21.8662	0.0718403		2016.12	23.3225	0.0898402		2016.62	21.9122	0.0516716
2017.5	23.4484	0.109749	21.9219	0.0730423		2017.12	23.3429	0.0842645		2017.62	21.9047	0.0403077
						2018.12	23.3804	0.101704

## Sheet: HFC-134a
HFC-134a
scale: SIO-05
annual means						JFM means				JAS means
Year	NH (ppt)	NH error (ppt)	SH (ppt)	SH error (ppt)		Year	NH (ppt)	NH error (ppt)		Year	SH (ppt)	SH error (ppt)
1973.5	0	0.671921	0	0		1973.13	0	0.782468		1973.62	0	0
1974.5	0	0.463592	0	0		1974.13	0	0.498071		1974.62	0	0
1975.5	0	0.459977	0	0		1975.13	0	0.444194		1975.62	0	0
1976.5	0	0.511749	0	0		1976.13	0	0.493084		1976.62	0	0
1977.5	0	0.541283	0	0		1977.13	0	0.535932		1977.62	0	0
1978.5	0	0.532247	0	0.24544		1978.13	0	0.541258		1978.62	0	0
1979.5	0	0.498149	0	0.252489		1979.13	0	0.512505		1979.62	0	0
1980.5	0	0.464174	0	0.253335		1980.13	0	0.474627		1980.62	0	0
1981.5	0	0.435031	0	0.252739		1981.13	0	0.446336		1981.62	0	0
1982.5	0	0.412098	0	0.252931		1982.13	0	0.416481		1982.62	0	0
1983.5	0	0.440938	0	0.252514		1983.13	0	0.420938		1983.62	0	0.252429
1984.5	0	0.4957	0	0.253388		1984.13	0	0.476518		1984.62	0	0.253522
1985.5	0	0.528164	0	0.263434		1985.13	0	0.52069		1985.62	0	0.265355
1986.5	0	0.536017	0	0.243548		1986.13	0	0.536198		1986.62	0	0.232697
1987.5	0	0.518609	0	0.295357		1987.13	0	0.529551		1987.62	0	0.306639
1988.5	0	0.478603	0	0.272678		1988.13	0	0.495512		1988.62	0	0.232931
1989.5	0	0.45263	0	0.245003		1989.13	0	0.454821		1989.62	4.1316e-10	0.245798
1990.5	0	0.464399	0	0.205063		1990.13	0	0.456416		1990.62	7.69745e-08	0.216043
1991.5	0	0.492296	0	0.232073		1991.13	0	0.480431		1991.62	0.000267337	0.211246
1992.5	0.0214253	0.501073	0	0.197344		1992.13	0	0.505269		1992.62	0.0435634	0.171647
1993.5	0.40988	0.449414	0	0.214527		1993.13	0.214833	0.480343		1993.62	0.107271	0.18501
1994.5	1.16709	0.335136	0.330739	0.166615		1994.13	0.81548	0.38101		1994.62	0.35877	0.199362
1995.5	2.40889	0.236489	1.02321	0.121756		1995.12	1.857	0.094921		1995.62	1.16769	0.103972
1996.5	4.23187	0.211358	2.07413	0.129093		1996.12	3.31567	0.146628		1996.62	2.21002	0.112805
1997.5	6.66369	0.217336	3.87217	0.137691		1997.12	6.02533	0.292649		1997.62	4.36567	0.142918
1998.5	9.72733	0.217164	5.88894	0.147651		1998.12	8.83973	0.236676		1998.62	6.24758	0.108501
1999.5	13.2273	0.205138	8.72682	0.144239		1999.12	11.7842	0.288329		1999.62	9.12893	0.137579
2000.5	16.9752	0.201418	11.761	0.147446		2000.12	15.5163	0.361298		2000.62	12.2731	0.175507
2001.5	20.9272	0.206478	14.95	0.145257		2001.12	19.4173	0.316397		2001.62	15.5032	0.239722
2002.5	25.183	0.205447	18.6244	0.155088		2002.12	23.2233	0.335309		2002.62	19.1983	0.243029
2003.5	29.7475	0.203764	22.355	0.145537		2003.12	27.7584	0.613343		2003.62	22.9604	0.205044
2004.5	34.4407	0.200643	26.4715	0.141452		2004.12	32.7423	0.366018		2004.62	27.1753	0.186693
2005.5	39.0542	0.197944	30.6966	0.1448		2005.12	37.3998	0.523363		2005.62	31.3291	0.225356
2006.5	43.5853	0.202625	34.8718	0.146528		2006.12	41.8344	0.504471		2006.62	35.4995	0.227984
2007.5	48.1963	0.20185	39.2159	0.158174		2007.12	46.0979	0.377223		2007.62	39.8854	0.222462
2008.5	53.0446	0.199628	43.673	0.15879		2008.12	51.269	0.464421		2008.62	44.3708	0.209895
2009.5	58.0897	0.195928	48.1265	0.158801		2009.12	55.7384	0.625104		2009.62	48.8116	0.257751
2010.5	63.2449	0.196006	53.0449	0.162265		2010.12	61.0233	0.414689		2010.62	53.9701	0.230275
2011.5	68.3313	0.193884	57.9359	0.15462		2011.12	66.3541	0.598753		2011.62	58.8398	0.380612
2012.5	73.3507	0.194852	62.7809	0.15879		2012.12	71.0153	0.62453		2012.62	63.6392	0.275895
2013.5	78.4975	0.196968	67.5621	0.15879		2013.12	76.6727	0.597667		2013.62	68.3301	0.240327
2014.5	84.0212	0.198353	72.5504	0.15879		2014.12	81.6825	0.509422		2014.62	73.5255	0.289463
2015.5	89.9293	0.202836	77.8565	0.15879		2015.12	87.0967	0.56154		2015.62	78.866	0.286483
2016.5	96.1932	0.209191	83.3878	0.15879		2016.12	93.4218	0.536797		2016.62	84.2869	0.313813
2017.5	102.696	0.240633	89.3667	0.165188		2017.12	99.9754	0.564024		2017.62	90.5625	0.367781
						2018.12	106.371	0.684537

## Sheet: HFC-125
HFC-125
scale: SIO-14
annual means						JFM means				JAS means
Year	NH (ppt)	NH error (ppt)	SH (ppt)	SH error (ppt)		Year	NH (ppt)	NH error (ppt)		Year	SH (ppt)	SH error (ppt)
1972.5	0	0	0	0		1973.13	0	0.137891		1972.62	0	0
1973.5	0	0.133376	0	0		1974.13	0	0.125038		1973.62	0	0
1974.5	0	0.127987	0	0		1975.13	0	0.131845		1974.62	0	0
1975.5	0	0.132288	0	0		1976.13	0	0.133391		1975.62	0	0
1976.5	0	0.133458	0	0		1977.13	0	0.13346		1976.62	0	0
1977.5	0	0.134059	0	0		1978.13	0	0.135809		1977.62	0	0
1978.5	0	0.134117	0.0068817	0.0680588		1979.13	0	0.125213		1978.62	0.0158801	0.066571
1979.5	0	0.116427	0.0182272	0.0731437		1980.13	0	0.103808		1979.62	0.0184102	0.074202
1980.5	0	0.115509	0.046397	0.077202		1981.13	0	0.166651		1980.62	0.0511069	0.0775134
1981.5	0	0.18802	0.0881358	0.0767367		1982.13	0	0.149824		1981.62	0.0935954	0.0765469
1982.5	0.0264018	0.128163	0.113195	0.0739066		1983.13	0.074807	0.133539		1982.62	0.115625	0.0734856
1983.5	0.14006	0.138866	0.0913231	0.0708866		1984.13	0.202162	0.144428		1983.62	0.0869466	0.0705136
1984.5	0.197722	0.14471	0.0208217	0.0696879		1985.13	0.171117	0.14343		1984.62	0.00886855	0.0696401
1985.5	0.146714	0.141343	0.0371937	0.0700502		1986.13	0.114543	0.137549		1985.62	0.0447818	0.0701341
1986.5	0.119886	0.135706	0.0440681	0.0696335		1987.13	0.159721	0.133641		1986.62	0.0388312	0.0694517
1987.5	0.203032	0.133495	0.0385241	0.069272		1988.13	0.263092	0.133741		1987.62	0.041358	0.0692257
1988.5	0.256285	0.134035	0.0396311	0.0711363		1989.13	0.18566	0.134209		1988.62	0.0382827	0.0716638
1989.5	0.165741	0.134155	0.0298818	0.074042		1990.13	0.236369	0.134297		1989.62	0.0282241	0.0744302
1990.5	0.331874	0.134517	0.0423937	0.0695703		1991.13	0.458753	0.134824		1990.62	0.0354193	0.0734731
1991.5	0.482551	0.134897	0.0454153	0.0714386		1992.13	0.487355	0.134933		1991.62	0.0488598	0.0700494
1992.5	0.460849	0.134863	0.0429342	0.0714159		1993.13	0.405418	0.134687		1992.62	0.0419814	0.0720212
1993.5	0.371668	0.134533	0.0521645	0.0731319		1994.13	0.334155	0.134396		1993.62	0.0541601	0.0732536
1994.5	0.35623	0.134716	0.0638067	0.0649384		1995.13	0.427382	0.13524		1994.62	0.0606576	0.0660402
1995.5	0.487601	0.134739	0.136436	0.0490434		1996.13	0.570958	0.133268		1995.62	0.143885	0.0422812
1996.5	0.529104	0.139121	0.225163	0.0592276		1997.13	0.425365	0.151554		1996.62	0.243684	0.0535099
1997.5	0.518861	0.14469	0.380575	0.0616484		1998.13	1.00424	0.104518		1997.62	0.397565	0.0673585
1998.5	1.15993	0.104534	0.652748	0.0427879		1999.12	1.29267	0.0442154		1998.62	0.724	0.0246847
1999.5	1.41246	0.0817837	0.908002	0.0373889		2000.12	1.61233	0.0596713		1999.62	0.967667	0.0250133
2000.5	1.75962	0.0813829	1.19419	0.0402316		2001.12	2.1564	0.0621906		2000.62	1.23633	0.0506919
2001.5	2.26464	0.104411	1.5509	0.0394114		2002.12	2.44533	0.0741305		2001.62	1.59	0.0526181
2002.5	2.66375	0.0837369	1.94978	0.0402275		2003.12	2.99767	0.113956		2002.62	2.043	0.0581636
2003.5	3.30911	0.0968118	2.38743	0.0377267		2004.12	3.61429	0.0656759		2003.62	2.432	0.050362
2004.5	3.88765	0.0799087	2.93983	0.0388423		2005.12	4.2822	0.0842466		2004.62	3.0214	0.0414043
2005.5	4.57422	0.0778957	3.48713	0.03801		2006.12	5.03573	0.080908		2005.62	3.57633	0.0428058
2006.5	5.38606	0.0809144	4.16066	0.0379959		2007.12	5.94186	0.0669984		2006.62	4.274	0.0460036
2007.5	6.30766	0.0807128	4.94611	0.0427139		2008.12	7.04063	0.0852429		2007.62	5.02842	0.0566075
2008.5	7.45414	0.0818078	5.85194	0.0412473		2009.12	8.19153	0.128351		2008.62	5.98744	0.0736103
2009.5	8.59743	0.0800537	6.86593	0.041242		2010.12	9.44324	0.112094		2009.62	7.00019	0.0879724
2010.5	10.0045	0.0837394	7.97058	0.0404621		2011.12	10.9888	0.140391		2010.62	8.16047	0.0610433
2011.5	11.676	0.079485	9.37095	0.0400817		2012.12	12.7133	0.200142		2011.62	9.61206	0.10086
2012.5	13.4407	0.0792456	10.8973	0.0412419		2013.12	14.867	0.180609		2012.62	11.1626	0.0813932
2013.5	15.5179	0.0840456	12.6351	0.041242		2014.12	16.9634	0.19767		2013.62	12.8741	0.080125
2014.5	17.5108	0.0836712	14.5903	0.041242		2015.12	18.9993	0.385308		2014.62	14.907	0.0904981
2015.5	20.0298	0.0897017	16.7558	0.041242		2016.12	21.6594	0.149581		2015.62	17.1323	0.100838
2016.5	22.6222	0.0837279	19.0818	0.041242		2017.12	24.521	0.188345		2016.62	19.4423	0.109334
2017.5	25.6769	0.0966556	21.7133	0.0487325		2017.13	24.4976	0.215831		2017.62	22.115	0.12569

## Sheet: HFC-23
HFC-23
scale: SIO-07
annual means						JFM means				JAS means
Year	NH (ppt)	NH error (ppt)	SH (ppt)	SH error (ppt)		Year	NH (ppt)	NH error (ppt)		Year	SH (ppt)	SH error (ppt)
1978.5	3.61712	0.042643	3.1901	0.0455419		1978.13	3.48633	0.0489149		1978.62	3.23537	0.0410587
1979.5	4.00647	0.0401399	3.53589	0.0403062		1979.13	3.84512	0.0399871		1979.62	3.58166	0.040369
1980.5	4.43946	0.0401445	3.91663	0.0402977		1980.13	4.26853	0.0400848		1980.62	3.96801	0.0403346
1981.5	4.88931	0.0401317	4.33132	0.0402885		1981.13	4.71562	0.0399583		1981.62	4.38673	0.0403664
1982.5	5.28561	0.0401389	4.7529	0.040296		1982.13	5.14816	0.0399871		1982.62	4.80772	0.0403666
1983.5	5.49452	0.0401399	5.12884	0.0403015		1983.13	5.453	0.0399871		1983.62	5.17572	0.040368
1984.5	5.74555	0.0401445	5.40618	0.0402977		1984.13	5.62493	0.0400848		1984.62	5.43894	0.0403346
1985.5	6.15604	0.0401317	5.70529	0.0402885		1985.13	5.9743	0.0399583		1985.62	5.74728	0.0403664
1986.5	6.65518	0.0401389	6.09841	0.040296		1986.13	6.45313	0.0399871		1986.62	6.15391	0.0403666
1987.5	7.01233	0.0401399	6.53165	0.0403015		1987.13	6.91465	0.0399871		1987.62	6.58709	0.040368
1988.5	7.64544	0.0401445	6.96187	0.0402977		1988.13	7.31701	0.0400848		1988.62	7.02088	0.0403346
1989.5	8.13099	0.0401317	7.52656	0.0402876		1989.13	8.02175	0.0399583		1989.62	7.60406	0.0403659
1990.5	8.68295	0.0401389	8.04106	0.0396424		1990.13	8.42052	0.0399871		1990.62	8.10592	0.0398532
1991.5	9.22512	0.0401399	8.57921	0.0397669		1991.13	9.04687	0.0399871		1991.62	8.65026	0.0403549
1992.5	9.74479	0.0401445	9.09332	0.0392627		1992.13	9.53684	0.0400848		1992.62	9.16677	0.0399064
1993.5	10.4036	0.0401317	9.65286	0.039368		1993.13	10.1247	0.0399583		1993.62	9.72295	0.0391091
1994.5	11.0999	0.0401389	10.2741	0.0400978		1994.13	10.8383	0.0399871		1994.62	10.3687	0.0403643
1995.5	11.8124	0.0401399	10.953	0.040301		1995.13	11.533	0.0399871		1995.62	11.0401	0.0403679
1996.5	12.5651	0.0401445	11.6383	0.0400834		1996.13	12.2715	0.0400848		1996.62	11.7307	0.0402744
1997.5	13.3758	0.0401317	12.3636	0.0394024		1997.13	13.0553	0.0399583		1997.62	12.4712	0.0402386
1998.5	14.1719	0.0401389	13.1564	0.0402252		1998.13	13.8767	0.0399871		1998.62	13.2598	0.0403604
1999.5	14.9432	0.0401399	13.9221	0.0392627		1999.13	14.651	0.0399871		1999.62	14.0263	0.0398924
2000.5	15.8066	0.0401445	14.7292	0.0402961		2000.13	15.4536	0.0400848		2000.62	14.8363	0.0403342
2001.5	16.5044	0.0401317	15.5289	0.0402885		2001.13	16.2958	0.0399583		2001.62	15.631	0.0403664
2002.5	17.1764	0.0401389	16.2376	0.0402936		2002.13	16.899	0.0399871		2002.62	16.329	0.040364
2003.5	17.8913	0.0401399	16.9257	0.0386227		2003.13	17.6222	0.0399871		2003.62	17.0127	0.0382452
2004.5	18.7561	0.0401445	17.6673	0.0379514		2004.13	18.3867	0.0400848		2004.62	17.7817	0.0394496
2005.5	19.7413	0.0401317	18.4974	0.035322		2005.13	19.3576	0.0399583		2005.62	18.6115	0.0349211
2006.5	20.949	0.0401389	19.4746	0.036683		2006.13	20.4353	0.0399871		2006.62	19.6072	0.0358353
2007.5	21.7879	0.0371159	20.5119	0.0355915		2007.13	21.5984	0.0399828		2007.62	20.6387	0.0358579
2008.5	22.5811	0.03094	21.3911	0.0291219		2008.12	22.151	0.102928		2008.62	21.516	0.15479
2009.5	23.1581	0.0311681	22.209	0.0303425		2009.12	22.8575	0.14137		2009.62	22.2597	0.124639
2010.5	23.7236	0.0398181	22.7193	0.0420079		2010.12	23.4136	0.126818		2010.62	22.7757	0.126011
2011.5	24.6312	0.0401381	23.5565	0.040299		2011.12	24.1909	0.116981		2011.62	23.6823	0.141215
2012.5	25.5519	0.0401381	24.3342	0.0402956		2012.12	25.1325	0.103343		2012.62	24.4583	0.102406
2013.5	26.6821	0.0401381	25.2366	0.0402956		2013.12	26.2699	0.0951618		2013.62	25.398	0.127606
2014.5	27.8686	0.0401381	26.2928	0.0402956		2014.12	27.2967	0.126854		2014.62	26.452	0.0967574
2015.5	28.8136	0.0401381	27.3834	0.0402956		2015.12	28.469	0.112589		2015.62	27.5883	0.0950193
2016.5	29.5872	0.0401383	28.3176	0.0403493		2016.12	29.2431	0.118554		2016.62	28.4637	0.0963898
2017.5	30.7194	0.049367	29.1744	0.05964		2017.12	30.1729	0.127208		2017.62	29.314	0.0926894

## Sheet: PFC-14
PFC-14
scale: SIO-05
annual means						JFM means				JAS means
Year	NH (ppt)	NH error (ppt)	SH (ppt)	SH error (ppt)		Year	NH (ppt)	NH error (ppt)		Year	SH (ppt)	SH error (ppt)
1900.5	34.053	0.0961212	34.0503	0.076018		1900.13	34.0521	0.10275		1900.62	34.0506	0.0744654
1901.5	34.0556	0.0748079	34.0526	0.0609218		1901.13	34.0546	0.0823278		1901.62	34.0529	0.0587128
1902.5	34.0582	0.065245	34.055	0.053877		1902.13	34.0572	0.0655509		1902.62	34.0553	0.0536533
1903.5	34.0611	0.0656691	34.0575	0.0539875		1903.13	34.06	0.065956		1903.62	34.0579	0.0539417
1904.5	34.0645	0.0649191	34.0604	0.0535583		1904.13	34.0631	0.0649556		1904.62	34.0608	0.0535451
1905.5	34.0691	0.0650263	34.0639	0.0536335		1905.13	34.0671	0.0650232		1905.62	34.0644	0.0536362
1906.5	34.075	0.0649924	34.0684	0.0536109		1906.13	34.0726	0.0649939		1906.62	34.069	0.0536099
1907.5	34.0819	0.0650001	34.074	0.0536164		1907.13	34.0793	0.065		1907.62	34.0747	0.0536166
1908.5	34.089	0.0649978	34.0802	0.0536148		1908.13	34.0863	0.0649979		1908.62	34.081	0.0536148
1909.5	34.0989	0.0649984	34.0877	0.0536152		1909.13	34.0944	0.0649984		1909.62	34.0887	0.0536153
1910.5	34.114	0.0649983	34.0982	0.0536151		1910.13	34.1076	0.0649983		1910.62	34.0996	0.0536151
1911.5	34.1318	0.0649983	34.1119	0.0536152		1911.13	34.1249	0.0649983		1911.62	34.1137	0.0536152
1912.5	34.1515	0.0649983	34.1282	0.0536152		1912.13	34.1437	0.0649983		1912.62	34.1303	0.0536152
1913.5	34.1733	0.0649983	34.1468	0.0536152		1913.13	34.1649	0.0649983		1913.62	34.1492	0.0536152
1914.5	34.1966	0.0649983	34.1674	0.0536152		1914.13	34.1876	0.0649983		1914.62	34.17	0.0536152
1915.5	34.2237	0.0649983	34.1904	0.0536152		1915.13	34.2126	0.0649983		1915.62	34.1933	0.0536152
1916.5	34.2589	0.0649983	34.218	0.0536152		1916.13	34.2442	0.0649983		1916.62	34.2217	0.0536152
1917.5	34.3014	0.0649983	34.2519	0.0536152		1917.13	34.2848	0.0649983		1917.62	34.2564	0.0536152
1918.5	34.3453	0.0649983	34.2905	0.0536152		1918.13	34.3292	0.0649983		1918.62	34.2954	0.0536152
1919.5	34.3857	0.0649983	34.3303	0.0536152		1919.13	34.3714	0.0649983		1919.62	34.3353	0.0536152
1920.5	34.4193	0.0649983	34.368	0.0536152		1920.13	34.4081	0.0649983		1920.62	34.3727	0.0536152
1921.5	34.4421	0.0649983	34.3997	0.0536152		1921.13	34.4352	0.0649983		1921.62	34.4033	0.0536152
1922.5	34.4651	0.0649983	34.4264	0.0536152		1922.13	34.4543	0.0649983		1922.62	34.4296	0.0536152
1923.5	34.5064	0.0649983	34.4577	0.0536152		1923.13	34.4877	0.0649983		1923.62	34.4619	0.0536152
1924.5	34.563	0.0649983	34.4998	0.0536152		1924.13	34.5407	0.0649983		1924.62	34.5054	0.0536152
1925.5	34.6234	0.0649983	34.5505	0.0536152		1925.13	34.6007	0.0649983		1925.62	34.557	0.0536152
1926.5	34.6858	0.0649983	34.6062	0.0536152		1926.13	34.6617	0.0649983		1926.62	34.6133	0.0536152
1927.5	34.7555	0.0649983	34.6671	0.0536152		1927.13	34.7278	0.0649983		1927.62	34.6749	0.0536152
1928.5	34.8362	0.0649983	34.7358	0.0536152		1928.13	34.8043	0.0649983		1928.62	34.7447	0.0536152
1929.5	34.9233	0.0649983	34.8126	0.0536152		1929.13	34.8907	0.0649983		1929.62	34.8224	0.0536152
1930.5	35.0034	0.0649983	34.892	0.0536152		1930.13	34.9758	0.0649983		1930.62	34.902	0.0536152
1931.5	35.0622	0.0649983	34.9643	0.0536152		1931.13	35.0443	0.0649983		1931.62	34.973	0.0536152
1932.5	35.0973	0.0649983	35.0212	0.0536152		1932.13	35.087	0.0649983		1932.62	35.0277	0.0536152
1933.5	35.1244	0.0649983	35.064	0.0536152		1933.13	35.1134	0.0649983		1933.62	35.0689	0.0536152
1934.5	35.1652	0.0649983	35.1038	0.0536152		1934.13	35.1462	0.0649983		1934.62	35.1088	0.0536152
1935.5	35.2352	0.0649983	35.1546	0.0536152		1935.13	35.2035	0.0649983		1935.62	35.1614	0.0536152
1936.5	35.3397	0.0649983	35.2272	0.0536152		1936.13	35.2953	0.0649983		1936.62	35.237	0.0536152
1937.5	35.4754	0.0649983	35.3265	0.0536152		1937.13	35.4202	0.0649983		1937.62	35.3397	0.0536152
1938.5	35.635	0.0649983	35.4518	0.0536152		1938.13	35.5721	0.0649983		1938.62	35.4683	0.0536152
1939.5	35.8138	0.0649983	35.6003	0.0536152		1939.13	35.7439	0.0649983		1939.62	35.6196	0.0536152
1940.5	36.0137	0.0649983	35.7696	0.0536152		1940.13	35.9343	0.0649983		1940.62	35.7912	0.0536152
1941.5	36.2646	0.0649983	35.9686	0.0536152		1941.13	36.158	0.0649983		1941.62	35.9944	0.0536152
1942.5	36.6064	0.0649983	36.2223	0.0536152		1942.13	36.4631	0.0649983		1942.62	36.2561	0.0536152
1943.5	37.0167	0.0649983	36.5451	0.0536152		1943.13	36.8604	0.0649983		1943.62	36.5883	0.0536152
1944.5	37.3573	0.0649983	36.8896	0.0536152		1944.13	37.2564	0.0649983		1944.62	36.9329	0.0536152
1945.5	37.5152	0.0649983	37.1647	0.0536152		1945.13	37.483	0.0649983		1945.62	37.1955	0.0536152
1946.5	37.5834	0.0649983	37.3438	0.0536152		1946.13	37.5556	0.0649983		1946.62	37.363	0.0536152
1947.5	37.7009	0.0649983	37.4848	0.0536152		1947.13	37.6445	0.0649983		1947.62	37.5021	0.0536152
1948.5	37.8762	0.0649983	37.6387	0.0536152		1948.13	37.8063	0.0649983		1948.62	37.6588	0.0536152
1949.5	38.061	0.0649983	37.8091	0.0536152		1949.13	37.993	0.0649983		1949.62	37.8307	0.0536152
1950.5	38.2441	0.0649983	37.9857	0.0536152		1950.13	38.1742	0.0649983		1950.62	38.0078	0.0536152
1951.5	38.441	0.0649983	38.1696	0.0536152		1951.13	38.3642	0.0649983		1951.62	38.1929	0.0536152
1952.5	38.6544	0.0649983	38.3654	0.0536152		1952.13	38.5723	0.0649983		1952.62	38.3903	0.0536152
1953.5	38.8816	0.0649983	38.5743	0.0536152		1953.13	38.7944	0.0649983		1953.62	38.6008	0.0536152
1954.5	39.1173	0.0649983	38.7947	0.0536152		1954.13	39.0286	0.0649983		1954.62	38.8226	0.0536152
1955.5	39.3506	0.0649983	39.0213	0.0536152		1955.13	39.2644	0.0649983		1955.62	39.0498	0.0536152
1956.5	39.5709	0.0649983	39.2464	0.0536152		1956.13	39.4914	0.0649983		1956.62	39.2744	0.0536152
1957.5	39.7704	0.0649983	39.4611	0.0536152		1957.13	39.6988	0.0649983		1957.62	39.4875	0.0536152
1958.5	39.96	0.0649983	39.6638	0.0536152		1958.13	39.8883	0.0649983		1958.62	39.6887	0.0536152
1959.5	40.1628	0.0649983	39.8642	0.0536152		1959.13	40.0833	0.0649983		1959.62	39.8893	0.0536152
1960.5	40.3843	0.0649983	40.0728	0.0536152		1960.13	40.2994	0.0649983		1960.62	40.0992	0.0536152
1961.5	40.6137	0.0649983	40.2907	0.0536152		1961.13	40.5271	0.0649983		1961.62	40.3182	0.0536152
1962.5	40.8507	0.0649983	40.5165	0.0536152		1962.13	40.7599	0.0649983		1962.62	40.5449	0.0536152
1963.5	41.1044	0.0649983	40.7528	0.0536152		1963.13	41.0059	0.0649983		1963.62	40.7827	0.0536152
1964.5	41.3859	0.0649983	41.0068	0.0536152		1964.13	41.275	0.0649983		1964.62	41.0392	0.0536152
1965.5	41.7012	0.0649983	41.2857	0.0536152		1965.13	41.5778	0.0649983		1965.62	41.3213	0.0536152
1966.5	42.0558	0.0649983	41.5953	0.0536152		1966.13	41.9157	0.0649983		1966.62	41.6349	0.0536152
1967.5	42.4614	0.0649983	41.9437	0.0536152		1967.13	42.3006	0.0649983		1967.62	41.9885	0.0536152
1968.5	42.9258	0.0649983	42.3392	0.0536152		1968.13	42.7418	0.0649983		1968.62	42.3901	0.0536152
1969.5	43.4628	0.0649983	42.7922	0.0536152		1969.13	43.2487	0.0649983		1969.62	42.8508	0.0536152
1970.5	44.0791	0.0649983	43.3127	0.0536152		1970.13	43.8364	0.0649983		1970.62	43.3799	0.0536152
1971.5	44.7735	0.0649983	43.9049	0.0536152		1971.13	44.5003	0.0649983		1971.62	43.981	0.0536152
1972.5	45.5615	0.0649983	44.5759	0.0536152		1972.13	45.2493	0.0649983		1972.62	44.6621	0.0536152
1973.5	46.4652	0.0649983	45.3413	0.0536152		1973.13	46.108	0.0649983		1973.62	45.4402	0.0536152
1974.5	47.4619	0.0649983	46.2063	0.0536152		1974.13	47.0803	0.0649983		1974.62	46.3179	0.0536152
1975.5	48.467	0.0649983	47.1356	0.0536152		1975.13	48.095	0.0649983		1975.62	47.2528	0.0536152
1976.5	49.4893	0.0649983	48.1006	0.0536152		1976.13	49.094	0.0649983		1976.62	48.222	0.0536152
1977.5	50.6024	0.0649983	49.1211	0.0536152		1977.13	50.1708	0.0649983		1977.62	49.251	0.0536152
1978.5	51.772	0.0649983	50.2046	0.0536152		1978.13	51.3312	0.0649983		1978.62	50.3418	0.0536152
1979.5	52.9669	0.0649983	51.3349	0.0536152		1979.13	52.5132	0.0649983		1979.62	51.4773	0.0536152
1980.5	54.192	0.0649983	52.505	0.0536152		1980.13	53.7318	0.0649983		1980.62	52.6529	0.0536152
1981.5	55.3715	0.0649983	53.6847	0.0536152		1981.13	54.9457	0.0649983		1981.62	53.8318	0.0536152
1982.5	56.4624	0.0649983	54.8271	0.0536152		1982.13	56.0627	0.0649983		1982.62	54.9679	0.0536152
1983.5	57.5345	0.0649983	55.9326	0.0536152		1983.13	57.1297	0.0649983		1983.62	56.0699	0.0536152
1984.5	58.5966	0.0649983	57.0229	0.0536152		1984.13	58.2076	0.0649983		1984.62	57.1591	0.0536152
1985.5	59.5622	0.0649983	58.0795	0.0536152		1985.13	59.2198	0.0649983		1985.62	58.2098	0.0536152
1986.5	60.4722	0.0649983	59.086	0.0536152		1986.13	60.1262	0.0649983		1986.62	59.2099	0.0536152
1987.5	61.4375	0.0649983	60.075	0.0536152		1987.13	61.0643	0.0649983		1987.62	60.1985	0.0536152
1988.5	62.4605	0.0649983	61.0854	0.0536152		1988.13	62.0717	0.0649983		1988.62	61.2127	0.0536152
1989.5	63.4981	0.0649983	62.1225	0.0536152		1989.13	63.1107	0.0649983		1989.62	62.253	0.0536152
1990.5	64.5127	0.0649983	63.1584	0.0536152		1990.13	64.1394	0.0649983		1990.62	63.2875	0.0536152
1991.5	65.4542	0.0649983	64.1528	0.0536152		1991.13	65.1178	0.0649983		1991.62	64.2755	0.0536152
1992.5	66.2974	0.0649983	65.069	0.0536152		1992.13	65.9946	0.0649983		1992.62	65.1803	0.0536152
1993.5	67.076	0.0649983	65.9043	0.0536152		1993.13	66.7906	0.0649983		1993.62	66.0062	0.0536152
1994.5	67.8226	0.0649983	66.6879	0.0536152		1994.13	67.5465	0.0649983		1994.62	66.7844	0.0536152
1995.5	68.5469	0.0649983	67.4436	0.0536152		1995.13	68.2788	0.0649983		1995.62	67.5374	0.0536152
1996.5	69.2535	0.0649983	68.1798	0.0536152		1996.13	68.9906	0.0649983		1996.62	68.2711	0.0536152
1997.5	69.9545	0.0649983	68.8976	0.0536151		1997.13	69.6916	0.0649983		1997.62	68.9866	0.0536151
1998.5	70.6552	0.0649984	69.6024	0.0536152		1998.13	70.3931	0.0649983		1998.62	69.6901	0.0536152
1999.5	71.3516	0.064998	70.2983	0.0536149		1999.13	71.0917	0.0649982		1999.62	70.385	0.0536148
2000.5	72.0374	0.064999	70.9821	0.0536159		2000.13	71.7826	0.0649985		2000.62	71.0671	0.0536164
2001.5	72.7159	0.0649939	71.6502	0.0536118		2001.13	72.4608	0.064997		2001.62	71.7329	0.0536101
2002.5	73.4187	0.0649929	72.3169	0.0536212		2002.13	73.1482	0.0649961		2002.62	72.4003	0.0536273
2003.5	74.1622	0.0648967	73.0105	0.0535356		2003.13	73.8793	0.0649383		2003.62	73.0984	0.053504
2004.5	74.9023	0.0646424	73.7351	0.0535603		2004.13	74.6313	0.0650031		2004.62	73.8266	0.0536601
2005.5	75.5906	0.0558274	74.467	0.0481018		2005.13	75.3422	0.0618193		2005.62	74.5579	0.0470968
2006.5	76.2336	0.0316687	75.2124	0.0278169		2006.12	76.2025	0.276729		2006.62	75.314	0.0784708
2007.5	76.9211	0.025047	75.9683	0.0244672		2007.12	76.6663	0.0718785		2007.62	76.102	0.0572779
2008.5	77.6239	0.0249946	76.6499	0.0211865		2008.12	77.3689	0.0830398		2008.62	76.744	0.0915314
2009.5	78.1677	0.0249921	77.3114	0.0209408		2009.12	77.9515	0.0879609		2009.62	77.4263	0.0871493
2010.5	78.7856	0.024992	77.8811	0.0217875		2010.12	78.5394	0.0696845		2010.62	77.9523	0.0808414
2011.5	79.5352	0.024992	78.5151	0.0206836		2011.12	79.2277	0.0993223		2011.62	78.5503	0.1063
2012.5	80.2813	0.024992	79.2967	0.0206743		2012.12	79.9973	0.0836745		2012.62	79.4163	0.0925833
2013.5	81.0277	0.0249922	80.0223	0.0206739		2013.12	80.7726	0.0854276		2013.62	80.0713	0.0955353
2014.5	81.7701	0.0249938	80.7607	0.0206749		2014.12	81.4692	0.0907588		2014.62	80.8743	0.105797
2015.5	82.5582	0.0253768	81.4399	0.0209876		2015.12	82.2381	0.0916246		2015.62	81.595	0.0905999
2016.5	83.3895	0.0260701	82.202	0.0215152		2016.12	83.1125	0.124421		2016.62	82.3403	0.0846503
2017.5	84.3044	0.0408998	83.0504	0.0335658		2017.12	83.9446	0.109576		2017.62	83.186	0.0972642

## Sheet: PFC-116
PFC-116
scale: SIO-07
annual means						JFM means				JAS means
Year	NH (ppt)	NH error (ppt)	SH (ppt)	SH error (ppt)		Year	NH (ppt)	NH error (ppt)		Year	SH (ppt)	SH error (ppt)
1900.5	0.00199901	0.0157892	0.00200011	0.0153873		1900.13	0.00199924	0.0168977		1900.62	0.00200014	0.0150831
1901.5	0.00200099	0.0122199	0.00199989	0.0124346		1901.13	0.00200048	0.0134783		1901.62	0.00199984	0.012004
1902.5	0.00199704	0.0106283	0.00200033	0.0110388		1902.13	0.00199885	0.010673		1902.62	0.00200051	0.0109907
1903.5	0.00201087	0.0107069	0.00199879	0.0110485		1903.13	0.00200413	0.0107557		1903.62	0.00199812	0.0110401
1904.5	0.00194999	0.0105773	0.0020045	0.0109709		1904.13	0.00198448	0.0105843		1904.62	0.00200703	0.0109686
1905.5	0.00222895	0.0105947	0.00198322	0.0109849		1905.13	0.00200568	0.0105942		1905.62	0.00197378	0.0109854
1906.5	0.00296657	0.0105891	0.0021605	0.0109807		1906.13	0.00267856	0.0105893		1906.62	0.00219722	0.0109805
1907.5	0.00376334	0.0105903	0.00272548	0.0109817		1907.13	0.00345552	0.0105903		1907.62	0.00280878	0.0109818
1908.5	0.00459893	0.0105899	0.00344573	0.0109814		1908.13	0.00427497	0.01059		1908.62	0.00353473	0.0109814
1909.5	0.00576742	0.01059	0.00428811	0.0109815		1909.13	0.00522988	0.01059		1909.62	0.00439843	0.0109815
1910.5	0.00754175	0.01059	0.00546804	0.0109815		1910.13	0.00679802	0.01059		1910.62	0.00562956	0.0109815
1911.5	0.00963744	0.01059	0.00702913	0.0109815		1911.13	0.00883127	0.01059		1911.62	0.00723501	0.0109815
1912.5	0.0119434	0.01059	0.00889067	0.0109815		1912.13	0.0110324	0.01059		1912.62	0.00913193	0.0109815
1913.5	0.014494	0.01059	0.0110213	0.0109815		1913.13	0.013512	0.01059		1913.62	0.0112963	0.0109815
1914.5	0.0172181	0.01059	0.0133828	0.0109815		1914.13	0.0161617	0.01059		1914.62	0.0136832	0.0109815
1915.5	0.0203924	0.01059	0.016012	0.0109815		1915.13	0.0190846	0.01059		1915.62	0.0163477	0.0109815
1916.5	0.0245291	0.01059	0.0191571	0.0109815		1916.13	0.0228025	0.01059		1916.62	0.0195702	0.0109815
1917.5	0.0295202	0.01059	0.0230218	0.0109815		1917.13	0.0275788	0.01059		1917.62	0.0235305	0.0109815
1918.5	0.0346366	0.01059	0.0274434	0.0109815		1918.13	0.0327619	0.01059		1918.62	0.0280113	0.0109815
1919.5	0.0392859	0.01059	0.03203	0.0109815		1919.13	0.0376522	0.01059		1919.62	0.0326049	0.0109815
1920.5	0.0430889	0.01059	0.0364031	0.0109815		1920.13	0.0418329	0.01059		1920.62	0.0369433	0.0109815
1921.5	0.0456299	0.01059	0.0401003	0.0109815		1921.13	0.0448642	0.01059		1921.62	0.0405285	0.0109815
1922.5	0.0482556	0.01059	0.0431825	0.0109815		1922.13	0.0470066	0.01059		1922.62	0.043546	0.0109815
1923.5	0.0530496	0.01059	0.0466938	0.0109815		1923.13	0.0508678	0.01059		1923.62	0.0471625	0.0109815
1924.5	0.0596018	0.01059	0.0514188	0.0109815		1924.13	0.0570187	0.01059		1924.62	0.0520546	0.0109815
1925.5	0.0665415	0.01059	0.0571393	0.0109815		1925.13	0.0639436	0.01059		1925.62	0.057879	0.0109815
1926.5	0.073664	0.01059	0.0634199	0.0109815		1926.13	0.0709168	0.01059		1926.62	0.0642167	0.0109815
1927.5	0.0815908	0.01059	0.0702477	0.0109815		1927.13	0.0784393	0.01059		1927.62	0.0711178	0.0109815
1928.5	0.0907309	0.01059	0.0778978	0.0109815		1928.13	0.0871249	0.01059		1928.62	0.0788844	0.0109815
1929.5	0.100502	0.01059	0.0864282	0.0109815		1929.13	0.0968621	0.01059		1929.62	0.0875252	0.0109815
1930.5	0.10934	0.01059	0.0952828	0.0109815		1930.13	0.106332	0.01059		1930.62	0.0963968	0.0109815
1931.5	0.115664	0.01059	0.103379	0.0109815		1931.13	0.113775	0.01059		1931.62	0.104355	0.0109815
1932.5	0.119268	0.01059	0.109772	0.0109815		1932.13	0.118235	0.01059		1932.62	0.110503	0.0109815
1933.5	0.122029	0.01059	0.114541	0.0109815		1933.13	0.120887	0.01059		1933.62	0.115085	0.0109815
1934.5	0.12639	0.01059	0.118841	0.0109815		1934.13	0.124336	0.01059		1934.62	0.119372	0.0109815
1935.5	0.133987	0.01059	0.124177	0.0109815		1935.13	0.130548	0.01059		1935.62	0.124889	0.0109815
1936.5	0.145264	0.01059	0.131713	0.0109815		1936.13	0.140498	0.01059		1936.62	0.132732	0.0109815
1937.5	0.159707	0.01059	0.141956	0.0109815		1937.13	0.153866	0.01059		1937.62	0.143325	0.0109815
1938.5	0.17644	0.01059	0.15483	0.0109815		1938.13	0.169893	0.01059		1938.62	0.156518	0.0109815
1939.5	0.194886	0.01059	0.169984	0.0109815		1939.13	0.187713	0.01059		1939.62	0.171947	0.0109815
1940.5	0.215239	0.01059	0.18707	0.0109815		1940.13	0.2072	0.01059		1940.62	0.189248	0.0109815
1941.5	0.240476	0.01059	0.206751	0.0109815		1941.13	0.229816	0.01059		1941.62	0.209289	0.0109815
1942.5	0.27426	0.01059	0.231279	0.0109815		1942.13	0.260214	0.01059		1942.62	0.234526	0.0109815
1943.5	0.313775	0.01059	0.262093	0.0109815		1943.13	0.298923	0.01059		1943.62	0.266202	0.0109815
1944.5	0.34532	0.01059	0.295021	0.0109815		1944.13	0.336252	0.01059		1944.62	0.299165	0.0109815
1945.5	0.358598	0.01059	0.321444	0.0109815		1945.13	0.356234	0.01059		1945.62	0.324404	0.0109815
1946.5	0.36328	0.01059	0.338326	0.0109815		1946.13	0.361292	0.01059		1946.62	0.34011	0.0109815
1947.5	0.372617	0.01059	0.350827	0.0109815		1947.13	0.367984	0.01059		1947.62	0.352331	0.0109815
1948.5	0.38705	0.01059	0.363914	0.0109815		1948.13	0.381319	0.01059		1948.62	0.365612	0.0109815
1949.5	0.401829	0.01059	0.378063	0.0109815		1949.13	0.396504	0.01059		1949.62	0.379851	0.0109815
1950.5	0.4157	0.01059	0.392212	0.0109815		1950.13	0.410531	0.01059		1950.62	0.393966	0.0109815
1951.5	0.429781	0.01059	0.406232	0.0109815		1951.13	0.424418	0.01059		1951.62	0.407984	0.0109815
1952.5	0.44413	0.01059	0.420364	0.0109815		1952.13	0.438767	0.01059		1952.62	0.422135	0.0109815
1953.5	0.458302	0.01059	0.434553	0.0109815		1953.13	0.453042	0.01059		1953.62	0.436327	0.0109815
1954.5	0.471777	0.01059	0.448524	0.0109815		1954.13	0.466911	0.01059		1954.62	0.450261	0.0109815
1955.5	0.483849	0.01059	0.461839	0.0109815		1955.13	0.479586	0.01059		1955.62	0.463478	0.0109815
1956.5	0.49408	0.01059	0.474028	0.0109815		1956.13	0.490562	0.01059		1956.62	0.475512	0.0109815
1957.5	0.502351	0.01059	0.484711	0.0109815		1957.13	0.499528	0.01059		1957.62	0.485992	0.0109815
1958.5	0.509425	0.01059	0.493887	0.0109815		1958.13	0.506843	0.01059		1958.62	0.494984	0.0109815
1959.5	0.51649	0.01059	0.5021	0.0109815		1959.13	0.513777	0.01059		1959.62	0.503104	0.0109815
1960.5	0.523813	0.01059	0.50993	0.0109815		1960.13	0.521068	0.01059		1960.62	0.510901	0.0109815
1961.5	0.530994	0.01059	0.517534	0.0109815		1961.13	0.528343	0.01059		1961.62	0.518476	0.0109815
1962.5	0.538071	0.01059	0.52492	0.0109815		1962.13	0.535401	0.01059		1962.62	0.525835	0.0109815
1963.5	0.545413	0.01059	0.532241	0.0109815		1963.13	0.542587	0.01059		1963.62	0.533154	0.0109815
1964.5	0.553445	0.01059	0.539788	0.0109815		1964.13	0.550289	0.01059		1964.62	0.54074	0.0109815
1965.5	0.562459	0.01059	0.547863	0.0109815		1965.13	0.558913	0.01059		1965.62	0.548889	0.0109815
1966.5	0.572832	0.01059	0.556772	0.0109815		1966.13	0.568672	0.01059		1966.62	0.557912	0.0109815
1967.5	0.585291	0.01059	0.566965	0.0109815		1967.13	0.580228	0.01059		1967.62	0.568281	0.0109815
1968.5	0.600696	0.01059	0.57905	0.0109815		1968.13	0.594367	0.01059		1968.62	0.580619	0.0109815
1969.5	0.620425	0.01059	0.59392	0.0109815		1969.13	0.61221	0.01059		1969.62	0.59587	0.0109815
1970.5	0.645884	0.01059	0.612712	0.0109815		1970.13	0.635352	0.01059		1970.62	0.615189	0.0109815
1971.5	0.678442	0.01059	0.63659	0.0109815		1971.13	0.664967	0.01059		1971.62	0.639734	0.0109815
1972.5	0.720309	0.01059	0.666999	0.0109815		1972.13	0.702935	0.01059		1972.62	0.671007	0.0109815
1973.5	0.773691	0.01059	0.705918	0.0109815		1973.13	0.751823	0.01059		1973.62	0.71107	0.0109815
1974.5	0.836894	0.01059	0.754523	0.0109815		1974.13	0.812222	0.01059		1974.62	0.760938	0.0109815
1975.5	0.902103	0.01059	0.810408	0.0109815		1975.13	0.878048	0.01059		1975.62	0.817573	0.0109815
1976.5	0.966943	0.01059	0.869892	0.0109815		1976.13	0.942191	0.01059		1976.62	0.877382	0.0109815
1977.5	1.03714	0.01059	0.932917	0.0109815		1977.13	1.00963	0.01059		1977.62	0.940925	0.0109815
1978.5	1.11378	0.01059	1.00092	0.0109815		1978.13	1.08429	0.01059		1978.62	1.00958	0.0109815
1979.5	1.19561	0.01059	1.07415	0.0109815		1979.13	1.16408	0.01059		1979.62	1.08345	0.0109815
1980.5	1.28187	0.01059	1.15258	0.0109815		1980.13	1.24922	0.01059		1980.62	1.16258	0.0109815
1981.5	1.36518	0.01059	1.2339	0.0109815		1981.13	1.33538	0.01059		1981.62	1.24414	0.0109815
1982.5	1.43831	0.01059	1.31256	0.0109815		1982.13	1.4124	0.01059		1982.62	1.32219	0.0109815
1983.5	1.50891	0.01059	1.3869	0.0109815		1983.13	1.48147	0.01059		1983.62	1.39602	0.0109815
1984.5	1.58794	0.01059	1.46276	0.0109815		1984.13	1.5569	0.01059		1984.62	1.47238	0.0109815
1985.5	1.67093	0.01059	1.54498	0.0109815		1985.13	1.64009	0.01059		1985.62	1.55553	0.0109815
1986.5	1.75458	0.01059	1.63079	0.0109815		1986.13	1.72257	0.01059		1986.62	1.64152	0.0109815
1987.5	1.84462	0.01059	1.71757	0.0109815		1987.13	1.80958	0.01059		1987.62	1.72843	0.0109815
1988.5	1.94137	0.01059	1.80787	0.0109815		1988.13	1.90447	0.01059		1988.62	1.81933	0.0109815
1989.5	2.03947	0.01059	1.90233	0.0109815		1989.13	2.00302	0.01059		1989.62	1.91427	0.0109815
1990.5	2.13463	0.01059	1.99715	0.0109815		1990.13	2.09961	0.01059		1990.62	2.00897	0.0109815
1991.5	2.22474	0.01059	2.08803	0.0109815		1991.13	2.19189	0.01059		1991.62	2.09921	0.0109815
1992.5	2.31002	0.01059	2.17387	0.0109815		1992.13	2.27856	0.01059		1992.62	2.18442	0.0109815
1993.5	2.3941	0.01059	2.25704	0.0109815		1993.13	2.36235	0.01059		1993.62	2.26738	0.0109815
1994.5	2.4822	0.01059	2.3405	0.0109815		1994.13	2.44805	0.01059		1994.62	2.35093	0.0109815
1995.5	2.58005	0.01059	2.42728	0.0109815		1995.13	2.5414	0.01059		1995.62	2.43825	0.0109815
1996.5	2.69152	0.01059	2.52134	0.0109815		1996.13	2.64752	0.01059		1996.62	2.53336	0.0109815
1997.5	2.81592	0.01059	2.62582	0.0109814		1997.13	2.76763	0.01059		1997.62	2.63923	0.0109814
1998.5	2.94794	0.01059	2.74125	0.0109817		1998.13	2.89792	0.01059		1998.62	2.75601	0.0109818
1999.5	3.08021	0.010589	2.86561	0.0109806		1999.13	3.03125	0.0105898		1999.62	2.88143	0.0109802
2000.5	3.20611	0.0105848	2.99393	0.0109834		2000.13	3.16028	0.0105868		2000.62	3.01005	0.010985
2001.5	3.32532	0.0105717	3.11944	0.0109626		2001.13	3.28123	0.0105813		2001.62	3.13492	0.0109548
2002.5	3.44324	0.0102528	3.2403	0.0109695		2002.13	3.39892	0.0105271		2002.62	3.25523	0.010995
2003.5	3.55839	0.00754627	3.36214	0.00964627		2003.13	3.51681	0.00908573		2003.62	3.37742	0.00938717
2004.5	3.65117	0.00426142	3.49132	0.00535091		2004.12	3.637	0.0357071		2004.62	3.51533	0.0325423
2005.5	3.73556	0.00407452	3.59506	0.00424579		2005.12	3.68888	0.0356929		2005.62	3.60133	0.0323986
2006.5	3.82851	0.0040701	3.68531	0.00424312		2006.12	3.79539	0.0297176		2006.62	3.706	0.0326701
2007.5	3.92584	0.00407006	3.78578	0.00462746		2007.12	3.88967	0.0266787		2007.62	3.80775	0.0227239
2008.5	4.00653	0.00407006	3.87166	0.00431033		2008.12	3.97101	0.0301145		2008.62	3.88867	0.0290459
2009.5	4.07311	0.00407006	3.96653	0.00429132		2009.12	4.05051	0.039239		2009.62	3.98633	0.0334166
2010.5	4.15275	0.00407006	4.03273	0.00446986		2010.12	4.10901	0.0320115		2010.62	4.041	0.0330101
2011.5	4.23878	0.00407006	4.11153	0.00424034		2011.12	4.21018	0.0302359		2011.62	4.132	0.0413763
2012.5	4.30824	0.00407006	4.18764	0.00423868		2012.12	4.27686	0.0238988		2012.62	4.19733	0.02504
2013.5	4.38496	0.00407009	4.26356	0.0042386		2013.12	4.36163	0.0181953		2013.62	4.277	0.0180185
2014.5	4.46773	0.00407038	4.34475	0.00423881		2014.12	4.43418	0.0228777		2014.62	4.358	0.0187083
2015.5	4.54717	0.004133	4.42782	0.00430276		2015.12	4.51621	0.0213124		2015.62	4.43967	0.0190175
2016.5	4.62671	0.0042476	4.50926	0.00440826		2016.12	4.58707	0.0215851		2016.62	4.51967	0.0211108
2017.5	4.7307	0.00667098	4.6004	0.00686621		2017.12	4.69164	0.0221779		2017.62	4.61433	0.0163401
